# Supplementary material for: Identification of a species-specific aminotransferase in Pediococcus acidilactici capable of forming α-aminobutyrate
Source: AMB Express. 2020 May 29;10:100. doi: 10.1186/s13568-020-01034-2 (PMC7260336; doi:10.1186/s13568-020-01034-2)
Supplement: Supplementary file 1 — Additional file 1: Figure S1. Sequence alignment of the aat gene from different Pediococcus acidilactici strains. The two primers aat_Fw and aat_Rv were used in the PCR reactions. [file 13568_2020_1034_MOESM1_ESM.xlsx]

## Sheet: fermentation_broth
Table S1. Concentrations of the free amino acids (mmol/L) in broth fermented with different pediococcal strains. The values of two independently performed experiments are shown. Basal broth stands for the non-inoculated medium.
(AABA: α-aminobutyrate, GABA: γ-aminobutyrate, FAA: free amino acids)
Experiment_1
Species/ Broth	Strain	Alanine	AABA	Arginine	Asparagine	Aspartate	Citrulline	GABA	Glutamin	Glutamate	Glycine	Histidine	Isoleucine	Leucine	Lysine	Methionine	Ornithine	Phenylalanine	Serine	Threonine	Tryptophan	Tyrosine	Valine	Total FAA
P. acidilactici	FAM13473	3.78844	2.70025	0.01069	0.544955	1.13593	0.12116	0.047915	0.0211288	3.27414	1.18912	0.340274	1.28442	1.86424	1.2985	0.323279	0.869572	0.80707	4.09919	3.07253	0.185916	0.189284	1.73944	28.9074
P. acidilactici	FAM13881	3.25496	1.87168	0.01029	0.580849	1.08761	0.381844	0.0471862	0.0173075	3.23412	1.11417	0.295052	1.22148	1.81716	1.21403	0.331751	0.536769	0.77202	4.52436	3.6689	0.164589	0.164705	1.67871	27.9895
P. acidilactici	FAM17411	6.35447	5.20902	0.00975875	0.535304	0.961624	0.00392375	0.0475962	0.0401888	2.89001	1.08844	0.295942	1.13742	1.69498	1.11898	0.295718	0.838756	0.617932	0.56932	0.0599525	0.153812	0.138139	1.57396	25.6352
P. acidilactici	FAM17418	6.75548	5.43393	0.0145387	0.575951	1.09369	0.01123	0.0512512	0.0427025	3.08218	1.39166	0.343624	1.22194	1.81838	1.2194	0.322642	1.03063	0.660929	0.982426	0.148129	0.172246	0.157085	1.69781	28.2279
P. acidilactici	FAM17422	6.81148	5.42097	0.0096875	0.547233	1.013	0.0051575	0.0496137	0.0406813	3.01826	1.13828	0.302525	1.18294	1.76951	1.18195	0.315343	0.89548	0.643293	0.352321	0.0402262	0.1671	0.141379	1.63538	26.6818
P. acidilactici	DSM 20082	5.71619	5.01837	0.0128075	0.552127	1.21587	0.016355	0.0528125	0.0133725	3.49883	1.25491	0.332001	1.28925	1.94342	1.2675	0.342085	0.986025	0.243833	2.19805	0.650035	0.168517	0.0937012	1.77777	28.6438
P. acidilactici	FAM18098	7.81217	5.94889	0.01183	0.565624	1.11981	0.019245	0.05334	0.049545	3.31392	1.19536	0.324239	1.2723	1.87928	1.27455	0.260181	0.925669	0.666467	0.122957	0.0162387	0.18005	0.152287	1.74856	28.9125
P. acidilactici	FAM18987	3.47392	1.55891	0.0122813	0.520734	1.21405	0.0555838	0.048175	0.0304125	3.37932	1.27695	0.345158	1.31681	1.90796	1.32247	0.33185	1.00234	0.606435	4.48607	4.11498	0.181229	0.164747	1.76145	29.1118
P. acidilactici	FAM19460	7.336	5.81301	0.0136425	0.524251	1.14527	0.206966	0.0614463	0.0391888	3.24204	1.19715	0.312694	1.25292	1.85436	1.20832	0.36061	0.78935	0.592184	0.282684	0.0297012	0.17863	0.153702	1.73079	28.3249
P. acidilactici	FAM20559	7.76109	5.86225	0.0104563	0.466687	1.19268	0.356381	0.0518363	0.0385238	3.28096	1.17081	0.322011	1.25288	1.83244	1.27036	0.336556	0.615814	0.741174	0.194436	0.0203125	0.175845	0.179089	1.73699	28.8696
P. pentosaceus	FAM13073	2.11432	0.11196	0.0103175	0.505386	1.01432	0.0300463	0.0428525	0.0145575	3.00839	1.03227	0.296401	1.14549	1.68872	1.1262	0.312845	0.845993	0.857916	4.92202	5.04633	0.178774	0.19076	1.57173	26.0676
P. pentosaceus	FAM17622	2.16887	0.0265463	0.01187	0.5475	0.99891	0.248307	0.045195	0.05283	3.05131	1.04678	0.298577	1.16734	1.7607	1.08027	0.327479	0.650534	0.886996	5.77287	5.3281	0.180665	0.190252	1.61594	27.4579
P. pentosaceus	FAM18813	2.2972	0.07827	0.010685	0.507021	1.19986	0.0322638	0.04549	0.0395825	3.31562	1.23456	0.358137	1.30992	1.86194	1.35986	0.333644	0.965272	0.935128	5.32311	5.55762	0.201137	0.233527	1.76895	28.9688
P. pentosaceus	FAM19080	2.24878	0.0892938	0.0111612	0.541722	1.0778	0.0910663	0.0454263	0.0664187	3.17433	1.11929	0.326929	1.23934	1.81653	1.24832	0.34092	0.845908	0.897639	5.87932	5.45816	0.18802	0.209714	1.67364	28.5897
P. pentosaceus	FAM19132	2.1607	0.0516187	0.0105125	0.516651	1.0315	0.0923662	0.044615	0.0299062	3.08812	1.07916	0.304069	1.18116	1.75451	1.17015	0.331838	0.776295	0.879696	5.02175	5.35947	0.182377	0.195871	1.62167	26.884
P. pentosaceus	FAM19144	2.2371	0.0347125	0.0106062	0.570476	1.00578	0.137293	0.0458863	0.0337387	3.1256	1.1043	0.291453	1.21877	1.81858	1.19498	0.348109	0.78824	0.890868	5.88101	5.56524	0.182037	0.202641	1.65935	28.3468
P. pentosaceus	FAM19169	2.33966	0.0651188	0.0112388	0.524866	1.173	0.0618125	0.0461225	0.0367688	3.35026	1.20729	0.333484	1.31452	1.90165	1.34967	0.35058	0.945171	0.95013	5.06955	5.65434	0.202767	0.226526	1.7671	28.8816
P. pentosaceus	FAM20650	2.16825	0.0138325	0.011565	0.533326	0.99664	0.227502	0.0441737	0.072195	3.03578	1.04129	0.302176	1.18323	1.77257	1.08817	0.337274	0.673914	0.868071	5.91572	5.60055	0.177524	0.189576	1.61389	27.8672
P. pentosaceus	DSM 20336	2.30111	0.104641	0.011175	0.573218	1.08746	0.09355	0.045975	0.032995	3.28286	1.136	0.336342	1.27731	1.88241	1.25537	0.357032	0.904428	0.943924	5.45202	5.67243	0.195224	0.211646	1.73284	28.89
Basal broth		2.01387	0.0156087	0.609865	0.542754	0.899339	0.07761	0.040955	0.0745337	2.78856	0.90326	0.230971	0.915911	1.55981	0.880805	0.276596	0.108739	0.779019	5.32332	4.95754	0.153334	0.15255	1.25526	24.5602
Experiment_2
Species/ Broth	Strain	Alanine	AABA	Arginine	Asparagine	Aspartate	Citrulline	GABA	Glutamin	Glutamate	Glycine	Histidine	Isoleucine	Leucine	Lysine	Methionine	Ornithine	Phenylalanine	Serine	Threonine	Tryptophan	Tyrosine	Valine	Total FAA
P. acidilactici	FAM13473	5.30837	4.81829	0.0108188	0.510394	1.04359	0.374491	0.0733387	0.0200675	2.98802	1.0942	0.294584	1.12901	1.73764	1.15187	0.297304	0.451767	0.623093	2.20199	0.792874	0.114824	0.133032	1.70307	26.8837
P. acidilactici	FAM13881	2.73509	1.77397	0.00938625	0.45232	0.899104	0.339385	0.0495512	0.0084075	2.55129	0.887942	0.258252	0.937165	1.43448	0.940823	0.265964	0.323121	0.651439	3.37557	2.59676	0.100535	0.132909	1.42695	22.1621
P. acidilactici	FAM17411	6.67391	5.76455	0.0126438	0.581035	1.02568	0.131884	0.105716	0.045275	3.05919	1.17411	0.272951	1.18982	1.82785	1.18097	0.281124	0.764289	0.771554	1.24006	0.200577	0.12681	0.159537	1.80417	28.4071
P. acidilactici	FAM17418	5.11457	4.68423	0.0126862	0.580914	0.973326	0.137052	0.0727412	0.0628688	2.95161	1.11099	0.299117	1.16414	1.79544	1.13664	0.290388	0.728071	0.75532	2.61121	1.09848	0.123713	0.15371	1.79804	27.6696
P. acidilactici	FAM17422	7.24118	5.96436	0.0116275	0.582638	1.0923	0.100575	0.081295	0.0452275	3.23118	1.20043	0.284888	1.24664	1.91665	1.25155	0.324455	0.93933	0.743146	0.654044	0.0693137	0.127252	0.157155	1.83701	29.1124
P. acidilactici	DSM 20082	5.28432	4.72981	0	0.462778	1.15078	0.0857138	0.0720325	0.0105725	3.14922	1.1237	0.295139	1.17852	1.79812	1.20817	0.343506	0.894409	0.335254	1.98478	0.491743	0.137199	0.0900425	1.65221	26.4874
P. acidilactici	FAM18098	7.08919	5.56089	0.0117475	0.504859	1.01126	0.127142	0.0786213	0.0429138	2.96218	1.10527	0.294596	1.12215	1.72955	1.12422	0.276144	0.825214	0.640877	0.253846	0.0302063	0.116289	0.136329	1.68289	26.7349
P. acidilactici	FAM18987	3.43456	1.72931	0.0114012	0.447749	1.15935	0.152977	0.0613	0.0258475	3.10787	1.1963	0.306831	1.18863	1.79429	1.24783	0.333044	0.89783	0.571191	3.79965	3.41871	0.123124	0.154436	1.7401	26.9119
P. acidilactici	FAM19460	6.80802	5.48122	0.0117488	0.453977	1.07407	0.128586	0.07753	0.02959	2.97489	1.08973	0.291244	1.11787	1.70128	1.10685	0.297949	0.647038	0.575915	0.229261	0.02374	0.1231	0.141283	1.6462	26.0401
P. acidilactici	FAM20559	7.41146	5.74865	0.00937	0.462871	1.08935	0.349284	0.0809312	0.03471	3.05522	1.08101	0.288587	1.13341	1.73169	1.16824	0.280404	0.482364	0.740815	0.274959	0.0281175	0.121682	0.163351	1.66714	27.4136
P. pentosaceus	FAM13073	2.16175	0.126596	0.00858875	0.502075	1.04115	0.0482425	0.0534888	0.0125387	3.03812	1.04043	0.296606	1.12501	1.71582	1.14763	0.289144	0.807929	0.86041	4.92493	4.9748	0.129065	0.188027	1.66296	26.1647
P. pentosaceus	FAM17622	2.18721	0.02898	0.011455	0.54852	1.00471	0.280523	0.0551075	0.0587838	3.03098	1.05791	0.279619	1.14585	1.76405	1.12034	0.305061	0.598187	0.880121	5.7036	5.17384	0.135315	0.188625	1.68564	27.2537
P. pentosaceus	FAM18813	2.24895	0.0614125	0.00881125	0.459496	1.23084	0.0510237	0.0532738	0.04891	3.2086	1.22761	0.339913	1.2414	1.81214	1.36593	0.303685	0.89397	0.902619	5.19722	5.38038	0.147787	0.227538	1.80268	28.223
P. pentosaceus	FAM19080	2.15003	0.0710188	0.0104338	0.5086	1.03144	0.0835512	0.052795	0.057435	2.99606	1.06157	0.307824	1.1322	1.71312	1.19108	0.288554	0.773371	0.851514	5.56207	5.13178	0.137156	0.194084	1.66204	26.9767
P. pentosaceus	FAM19132	2.20118	0.0680738	0.00965625	0.50381	1.073	0.102959	0.0542775	0.0319313	3.10557	1.07655	0.315323	1.16964	1.7734	1.19889	0.307715	0.792397	0.894065	4.94979	5.25169	0.139848	0.195675	1.71196	26.9364
P. pentosaceus	FAM19144	2.29653	0.0586812	0.00950625	0.57249	1.04524	0.158281	0.0567662	0.036995	3.15671	1.11519	0.325521	1.19487	1.83139	1.23098	0.334224	0.770245	0.90519	5.87228	5.51265	0.142595	0.203006	1.75459	28.5939
P. pentosaceus	FAM19169	2.19098	0.0724937	0.00864375	0.482571	1.11448	0.0701438	0.0523112	0.0415675	3.08867	1.12344	0.336769	1.1702	1.74635	1.26787	0.307298	0.821394	0.880761	4.72277	5.16329	0.142041	0.208935	1.71988	26.7418
P. pentosaceus	FAM20650	2.18926	0.01318	0.0093725	0.537261	1.00149	0.257126	0.055045	0.07537	3.01558	1.04864	0.297606	1.13463	1.76141	1.07547	0.324062	0.584541	0.871199	5.90637	5.54169	0.136925	0.184746	1.67085	27.702
P. pentosaceus	DSM 20336	2.12152	0.113949	0.00768	0.518683	0.993012	0.11842	0.0526288	0.03232	2.96752	1.02528	0.301638	1.09637	1.68598	1.11539	0.310004	0.705469	0.846639	4.95855	5.07471	0.131573	0.183116	1.63316	26.0036
Basal broth		2.21981	0.0116725	0.657445	0.59079	0.995592	0.0927	0.0536638	0.07495	3.0661	0.967873	0.261614	0.979243	1.71139	0.963505	0.298191	0.0733137	0.85825	5.90092	5.45883	0.140014	0.164166	1.42426	26.9742
